# Supplementary material
Source: ML conference proceedings conference paper supplement (https://openreview.net/forum?id=SSbcfUg1Af)
Supplement: supplementary_material [file attachment]

# UNI4D-LLM: A UNIFIED SPATIOTEMPORAL-AWARE VLM FOR 4D UNDERSTANDING AND GENERATION —*Supplementary Material*—

**Anonymous authors**

Paper under double-blind review

In this supplementary material, we provide additional technical details and experimental validations on our training details, method, and comparison. For our training details, we introduce the detailed training pipeline and datasets in Sec. 1. For our method, we conduct extensive experiments on ablation study and discussion in Sec. 2, including applicability to different camera settings in Sec. 2.1, task prompt in Sec. 2.2, textual coordinate embedding in Sec. 2.3, and the potential solution to the limitations in Sec. 2.4. Regarding our comparison, we provide more quantitative and qualitative results of 2D/3D/4D scene understanding and generation in Sec. 3.1-3.3.

## 1 DETAILS OF TRAINING PIPELINE AND DATASET

In Table 1, we provide details of our training datasets and training strategy. We integrate diverse 2D, 3D, and 4D vision-language datasets for both understanding and generation, which are utilized at different training stages. The entire training pipeline is divided into three stages as follows:

Table 1: Training pipeline and datasets.

| Training Stage                               | Samples | Data Source                                                                                                                                                                                                                                                                                                                             |
|----------------------------------------------|---------|-----------------------------------------------------------------------------------------------------------------------------------------------------------------------------------------------------------------------------------------------------------------------------------------------------------------------------------------|
| Stage 1: Fundamental Representation Learning | 1.8 M   | ImageNet-1K (Deng et al., 2009), WebVid-10M (Bain et al., 2021), Panda-70M (Chen et al., 2024), InternVid-10M (Wang et al., 2023), Valley (Luo et al., 2023), Grand (Rasheed et al., 2024), ANet-RTL (Huang et al., 2024), MUSE (Ren et al., 2024)                                                                                      |
| Stage 2: Multimodal Spatiotemporal Alignment | 980.6 K | MMScan (Lyu et al., 2024), SCan2Cap (Chen et al., 2021), ScanQA (Azuma et al., 2022), SQA3D (Ma et al., 2022), Multi3dRefer (Zhang et al., 2023), ScanRef (Chen et al., 2020), Chat4d (Zhou & Lee, 2025), CO3D (Reizenstein et al., 2021), Objaverse (Deitke et al., 2023), RealEstate (Zhou et al., 2018), MVImgNet (Yu et al., 2023b) |
| Stage 3: 4D Task Instruction Fine-Tuning     | 160.7 K | Chat4D (Zhou & Lee, 2025), 4DNex-10M (Chen et al., 2025), DyCheck (Gao et al., 2022)                                                                                                                                                                                                                                                    |

**Stage 1: Fundamental Representation Learning.** This stage is to equip our model with fundamental representation learning capabilities, *i.e.* multi-task visual representation, scene visual representation, and linguistic representation. For the datasets, we integrate typical 2D image/video-text pairs for scene understanding including dense caption and visual QA. The dense caption datasets include ImageNet-1K (Deng et al., 2009), WebVid-10M (Bain et al., 2021), Panda-70M (Chen et al., 2024), InternVid-10M (Wang et al., 2023), and Valley (Luo et al., 2023). The VQA datasets include Grand (Rasheed et al., 2024), ANet-RTL (Huang et al., 2024), and MUSE (Ren et al., 2024). In total, these datasets contain 1.8M samples, where textual captions can also serve as conditional text for scene generation. We use these datasets to preliminarily align the content between visual and linguistic representations for both understanding and generation tasks, which gives our model the ability for fundamental representation learning. Regarding the training strategy, we update the trainable parameters of multiple embeddings, projector, lower layers of the LLM, multi-task heads, while keeping all other modules frozen.

**Stage 2: Multimodal Spatiotemporal Alignment.** This stage aims to further enhance the spatiotemporal awareness of visual and linguistic representations, and transfer the capability of our model to the physical world. For the datasets, we introduce 3D scene understanding datasets, including dense caption, visual QA, and visual grounding. The dense caption datasets consist of MMScan (Lyu et al., 2024) and Scan2Cap (Chen et al., 2021). The visual QA datasets contain ScanQA (Azuma et al., 2022) and SQA3D (Ma et al., 2022). The visual grounding datasets include Multi3DRefer

(Zhang et al., 2023) and ScanRef (Chen et al., 2020). We also introduce a small portion of 4D scene understanding datasets related to dense caption from Chat4D (Zhou & Lee, 2025). Additionally, we integrate 3D generation datasets, such as CO3D (Reizenstein et al., 2021), Objaverse (Deitke et al., 2023), RealEstate10k (Zhou et al., 2018) and MVIImgNet (Yu et al., 2023b) to improve the generation quality, where the conditional text can also serve as the caption for scene understanding tasks. In total, these datasets contain 980.6K samples. We employ hybrid datasets to align fine-grained spatiotemporal information between visual and linguistic representations for both understanding and generation tasks. For the training strategy, we update the trainable parameters of spatiotemporal embedding, adaptive cross-attention fusion, higher layers of the LLM, and multi-task heads while keeping the remaining modules frozen.

**Stage 3: 4D Task Instruction Fine-Tuning.** This stage is to improve the generalization of our model for understanding and generation tasks in more complex 4D dynamic scenes. For the datasets, we introduce the typical 4D understanding dataset Chat4D (Zhou & Lee, 2025), and integrate 4D generation datasets including 4DNex-10M (Chen et al., 2025) and DyCheck (Gao et al., 2022). In total, these datasets contain 160.7K samples. We employ these 4D multimodal datasets to perform fine-tuning to adapt our model to the intricacies of complex 4D scenarios. For the training strategy, all trainable parameters are optimized through LoRA adapters. The vision encoder-decoder and geometry encoder remain frozen.

## 2 ABLATION STUDY AND DISCUSSION

### 2.1 APPLICABILITY TO DIFFERENT INPUT SETTINGS

Although we introduce the entire model using multi-view videos as an input example, we also discuss the applicability of our model to other input settings such as single-view video. We use single-view videos collected from the 4D vision datasets of Chat4D (Zhou & Lee, 2025) and the corresponding instruction-following texts as ground truths for evaluation of the understanding task. As shown in Table 2, the performance metrics of our model with single-view videos as input are comparable to our model with multi-view videos as input. This shows that our model is applicable to different input settings and is practical for the real world.

Table 2: Ablation study on the effect of various vision inputs on scene understanding performance.

| Vision input         | C $\uparrow$ | SAcc@0.5 $\uparrow$ | TAcc $\uparrow$ |
|----------------------|--------------|---------------------|-----------------|
| w/ Single-view video | 93.6         | 57.9                | 54.5            |
| w/ Multi-view video  | <b>93.8</b>  | <b>58.2</b>         | <b>54.6</b>     |

### 2.2 IMPACT OF TASK PROMPT

In Table 3, we analyze the impact of the task prompt on model performance. The results show that introducing the task prompt significantly improves the model performance on both understanding and generation for 4D scenes. The main reason is that the task prompt not only distinguishes the features of understanding and generation within the visual representation, but also guides the subsequent attention mask to dynamically regulate the information flow of different tasks in our model. These mechanisms enhance the capability of our model for multi-task prediction.

Table 3: Ablation study on the effect of task prompt on model performance.

| Task prompt | Chat4D       |                     |                 | DyCheck         |                  |                   |
|-------------|--------------|---------------------|-----------------|-----------------|------------------|-------------------|
|             | C $\uparrow$ | SAcc@0.5 $\uparrow$ | TAcc $\uparrow$ | PSNR $\uparrow$ | FVD $\downarrow$ | CLIP-C $\uparrow$ |
| w/o Prompt  | 85.1         | 47.5                | 45.3            | 17.54           | 216.1            | 0.91              |
| w/ Prompt   | <b>93.8</b>  | <b>58.2</b>         | <b>54.6</b>     | <b>21.38</b>    | <b>152.3</b>     | <b>0.97</b>       |

## 2.3 EFFECT OF TEXTUAL COORDINATE EMBEDDING

In Table 4, we study the effect of textual coordinate embedding, *i.e.* pos/time encoding via special token embedding (Li et al., 2025) on understanding performance. First, textual coordinates as instructions improve the fine-grained spatiotemporal understanding of our model. Second, textual coordinate embedding further improves the upper limit of 4D spatiotemporal understanding. This is because textual coordinate embedding helps minimize the risk that large language models misinterpret coordinate values.

Table 4: Discussion on the effect of textual coordinate embedding for scene understanding.

| Text instruction |               | C↑          | SAcc@0.5↓   | TAcc↑       |
|------------------|---------------|-------------|-------------|-------------|
| w/o Coordinate   |               | 84.2        | 39.6        | 19.3        |
| w/ Coordinate    | w/o Embedding | 90.5        | 55.1        | 52.7        |
|                  | w/ Embedding  | <b>93.8</b> | <b>58.2</b> | <b>54.6</b> |

## 2.4 LIMITATION AND POTENTIAL SOLUTION

Despite strong performance in most short-term scene understanding and generation, our Uni4D-LLM struggles with long-term dynamics. Capturing such variations requires memory-based reasoning to model cross-spatiotemporal interactions and causal relations. However, the current framework relies on short-range attention, which primarily captures correlations within limited temporal windows. As a result, the model lacks explicit mechanisms to retain or propagate motion information across extended sequences and thus makes it difficult to reason about long-horizon dependencies. In the future, we plan to integrate a world model (Ha & Schmidhuber, 2018) to enable long-term spatiotemporal reasoning and extend scene understanding and generation to longer temporal horizons. This will improve the practicality of our model.

# 3 QUANTITATIVE AND QUALITATIVE RESULTS

## 3.1 QUANTITATIVE COMPARISON ON 2D UNDERSTANDING BENCHMARK

In Table 5, we compare the basic visual understanding capability of our model with other 2D, 3D and 4D VLMs on several typical 2D understanding benchmarks, including VQAv2 (Goyal et al., 2017), MMBench (Liu et al., 2024b), MME (Fu et al., 2024), MM-Vet (Yu et al., 2023a). The results show that our method can maintain the same level of image understanding as other competing VLMs. This also indirectly proves that our model can obtain the initial multimodal understanding capability from the 2D datasets.

Table 5: Quantitative results of VLMs for scene understanding on 2D zero-shot benchmarks.

| Methods |                                 | VQAv2 | MMBench | MME  | MM-Vet |
|---------|---------------------------------|-------|---------|------|--------|
| 2D      | MobileVLM (Chu et al., 2023)    | 47.5  | 59.6    | 1289 | –      |
|         | Qwen-VL (Bai et al., 2023)      | 63.8  | 38.2    | –    | –      |
|         | Qwen-VL-Chat (Bai et al., 2023) | 61.5  | 60.6    | 1488 | –      |
|         | LLaMA-VID (Li et al., 2024)     | –     | 65.1    | 1521 | –      |
|         | LLaVA-1.5 (Liu et al., 2024a)   | 58.2  | 65.2    | 1511 | 31.1   |
| 3D      | LLaVA-3D (Zhu et al., 2024)     | 57.8  | 65.0    | 1502 | 30.9   |
| 4D      | Uni4D-LLM (Ours)                | 58.8  | 64.5    | 1506 | 30.7   |

## 3.2 QUALITATIVE COMPARISON ON 3D UNDERSTANDING BENCHMARK

In Fig. 1, we provide more visual comparisons on 3D scene understanding and generation, where we provide some typical scenes as examples. In 3D understanding, our Uni4D-LLM is more fine-grained than the competing 3D VLMs in representing spatial characteristics of the scene. In 3D generation,

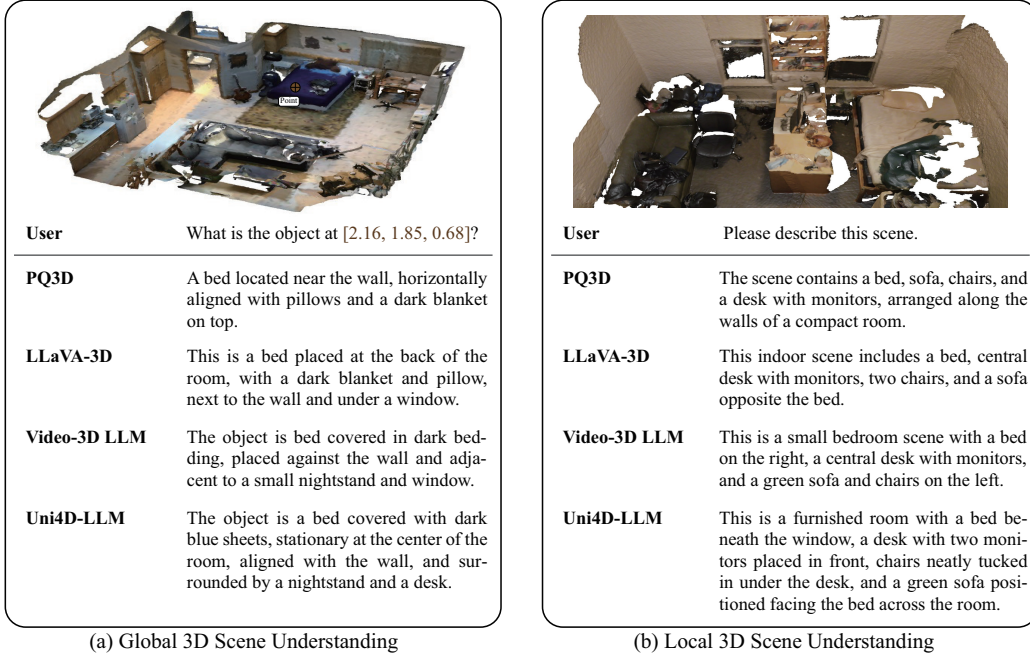

Figure 1: Visual comparison of VLMs on 3D scene understanding.

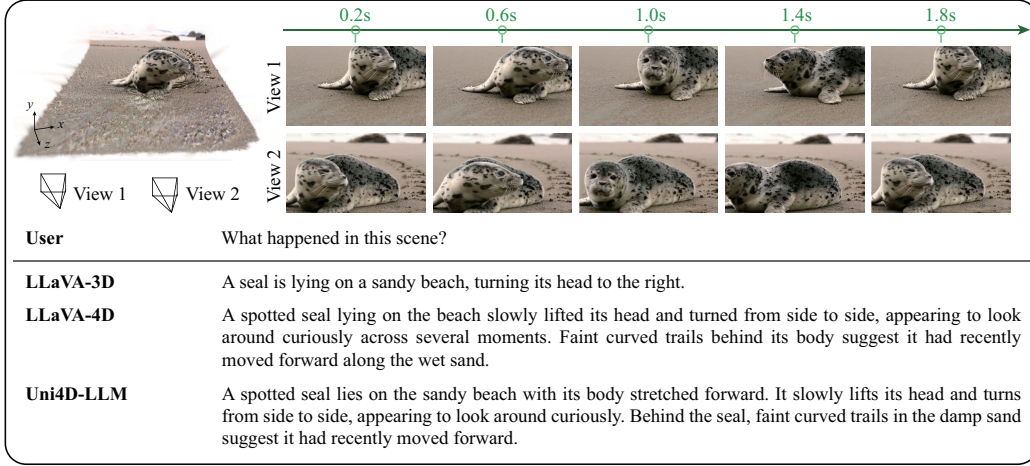

Figure 2: Visual comparison of VLMs on 4D scene understanding.

the results generated by our model are on par with those of 3D generation models. These results demonstrate the effectiveness of our model on both 3D scene understanding and generation.

### 3.3 QUALITATIVE COMPARISON ON 4D UNDERSTANDING AND GENERATION BENCHMARK

In Fig. 2 and 3, we also provide more visual comparisons on 4D scene understanding and generation. In 4D understanding, 3D VLMs struggle to capture temporal dynamics, while our model demonstrates strong spatiotemporal reasoning on par with recent 4D VLMs. In 4D generation, our Uni4D-LLM produces sharp and coherent results that rival those of advanced 4D diffusion models. These results demonstrate the superiority of our Uni4D-LLM in 4D understanding and generation, underscoring its potential as a unified multi-task framework for the physical world.

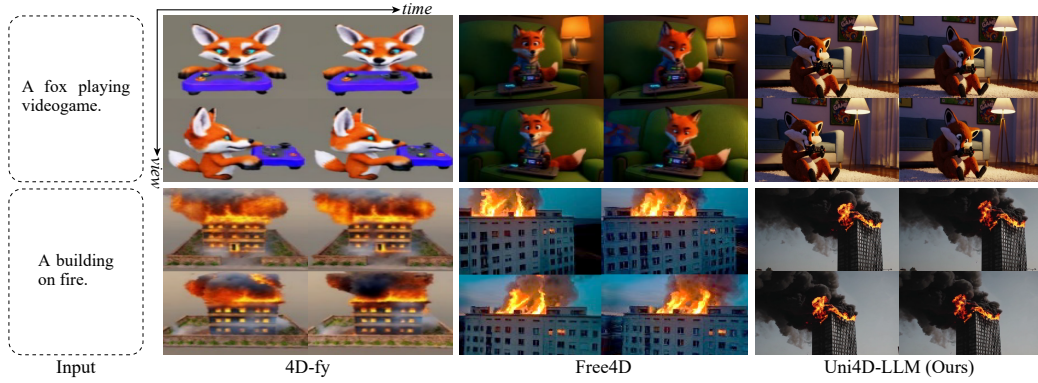

Figure 3: Visual comparison on 4D scene generation.

## REFERENCES

- Daichi Azuma, Taiki Miyanishi, Shuhei Kurita, and Motoaki Kawanabe. Scanqa: 3d question answering for spatial scene understanding. In *IEEE Conf. Comput. Vis. Pattern Recog.*, pp. 19129–19139, 2022.
- Jinze Bai, Shuai Bai, Shusheng Yang, Shijie Wang, Sinan Tan, Peng Wang, Junyang Lin, Chang Zhou, and Jingren Zhou. Qwen-vl: A frontier large vision-language model with versatile abilities. *arXiv preprint arXiv:2308.12966*, 1(2):3, 2023.
- Max Bain, Arsha Nagrani, Gül Varol, and Andrew Zisserman. Frozen in time: A joint video and image encoder for end-to-end retrieval. In *Proceedings of the IEEE/CVF international conference on computer vision*, pp. 1728–1738, 2021.
- Dave Zhenyu Chen, Angel X Chang, and Matthias Nießner. Scanrefer: 3d object localization in rgb-d scans using natural language. In *European conference on computer vision*, pp. 202–221. Springer, 2020.
- Tsai-Shien Chen, Aliaksandr Siarohin, Willi Menapace, Ekaterina Deyneka, Hsiang-wei Chao, Byung Eun Jeon, Yuwei Fang, Hsin-Ying Lee, Jian Ren, Ming-Hsuan Yang, et al. Panda-70m: Captioning 70m videos with multiple cross-modality teachers. In *Proceedings of the IEEE/CVF Conference on Computer Vision and Pattern Recognition*, pp. 13320–13331, 2024.
- Zhaoxi Chen, Tianqi Liu, Long Zhuo, Jiawei Ren, Zeng Tao, He Zhu, Fangzhou Hong, Liang Pan, and Ziwei Liu. 4dnex: Feed-forward 4d generative modeling made easy. *arXiv preprint arXiv:2508.13154*, 2025.
- Zhenyu Chen, Ali Gholami, Matthias Nießner, and Angel X Chang. Scan2cap: Context-aware dense captioning in rgb-d scans. In *IEEE Conf. Comput. Vis. Pattern Recog.*, pp. 3193–3203, 2021.
- Xiangxiang Chu, Limeng Qiao, Xinyang Lin, Shuang Xu, Yang Yang, Yiming Hu, Fei Wei, Xinyu Zhang, Bo Zhang, Xiaolin Wei, et al. Mobilevlm: A fast, reproducible and strong vision language assistant for mobile devices. *arXiv preprint arXiv:2312.16886*, 1(2):3, 2023.
- Matt Deitke, Dustin Schwenk, Jordi Salvador, Luca Weihs, Oscar Michel, Eli VanderBilt, Ludwig Schmidt, Kiana Ehsani, Aniruddha Kembhavi, and Ali Farhadi. Objaverse: A universe of annotated 3d objects. In *IEEE Conf. Comput. Vis. Pattern Recog.*, pp. 13142–13153, 2023.
- Jia Deng, Wei Dong, Richard Socher, Li-Jia Li, Kai Li, and Li Fei-Fei. Imagenet: A large-scale hierarchical image database. In *IEEE Conf. Comput. Vis. Pattern Recog.*, pp. 248–255. Ieee, 2009.
- Chaoyou Fu, Yuhang Dai, Yongdong Luo, Lei Li, Shuhuai Ren, Renrui Zhang, Zihan Wang, Chenyu Zhou, Yunhang Shen, Mengdan Zhang, et al. Video-mme: The first-ever comprehensive evaluation benchmark of multi-modal llms in video analysis. *arXiv preprint arXiv:2405.21075*, 2024.

- Hang Gao, Ruilong Li, Shubham Tulsiani, Bryan Russell, and Angjoo Kanazawa. Monocular dynamic view synthesis: A reality check. *Advances in Neural Information Processing Systems*, 35: 33768–33780, 2022.
- Yash Goyal, Tejas Khot, Douglas Summers-Stay, Dhruv Batra, and Devi Parikh. Making the v in vqa matter: Elevating the role of image understanding in visual question answering. In *Proceedings of the IEEE conference on computer vision and pattern recognition*, pp. 6904–6913, 2017.
- David Ha and Jürgen Schmidhuber. Recurrent world models facilitate policy evolution. *Adv. Neural Inform. Process. Syst.*, 31, 2018.
- De-An Huang, Shijia Liao, Subhashree Radhakrishnan, Hongxu Yin, Pavlo Molchanov, Zhiding Yu, and Jan Kautz. Lita: Language instructed temporal-localization assistant. In *European Conference on Computer Vision*, pp. 202–218. Springer, 2024.
- Hongyu Li, Jinyu Chen, Ziyu Wei, Shaofei Huang, Tianrui Hui, Jialin Gao, Xiaoming Wei, and Si Liu. Llava-st: A multimodal large language model for fine-grained spatial-temporal understanding. *arXiv preprint arXiv:2501.08282*, 2025.
- Yanwei Li, Chengyao Wang, and Jiaya Jia. Llama-vid: An image is worth 2 tokens in large language models. In *European Conference on Computer Vision*, pp. 323–340. Springer, 2024.
- Haotian Liu, Chunyuan Li, Yuheng Li, and Yong Jae Lee. Improved baselines with visual instruction tuning. In *Proceedings of the IEEE/CVF Conference on Computer Vision and Pattern Recognition*, pp. 26296–26306, 2024a.
- Yuan Liu, Haodong Duan, Yuanhan Zhang, Bo Li, Songyang Zhang, Wangbo Zhao, Yike Yuan, Jiaqi Wang, Conghui He, Ziwei Liu, et al. Mmbench: Is your multi-modal model an all-around player? In *European conference on computer vision*, pp. 216–233. Springer, 2024b.
- Ruipu Luo, Ziwang Zhao, Min Yang, Junwei Dong, Da Li, Pengcheng Lu, Tao Wang, Linmei Hu, Minghui Qiu, and Zhongyu Wei. Valley: Video assistant with large language model enhanced ability. *arXiv preprint arXiv:2306.07207*, 2023.
- Ruiyuan Lyu, Jingli Lin, Tai Wang, Xiaohan Mao, Yilun Chen, Runsen Xu, Haifeng Huang, Chenming Zhu, Dahua Lin, and Jiangmiao Pang. Mmscan: A multi-modal 3d scene dataset with hierarchical grounded language annotations. *Advances in Neural Information Processing Systems*, 37:50898–50924, 2024.
- Xiaojian Ma, Silong Yong, Zilong Zheng, Qing Li, Yitao Liang, Song-Chun Zhu, and Siyuan Huang. Sqa3d: Situated question answering in 3d scenes. *arXiv preprint arXiv:2210.07474*, 2022.
- Hanoona Rasheed, Muhammad Maaz, Sahal Shaji, Abdelrahman Shaker, Salman Khan, Hisham Cholakkal, Rao M Anwer, Eric Xing, Ming-Hsuan Yang, and Fahad S Khan. Glamm: Pixel grounding large multimodal model. In *IEEE Conf. Comput. Vis. Pattern Recog.*, pp. 13009–13018, 2024.
- Jeremy Reizenstein, Roman Shapovalov, Philipp Henzler, Luca Sbordone, Patrick Labatut, and David Novotny. Common objects in 3d: Large-scale learning and evaluation of real-life 3d category reconstruction. In *Int. Conf. Comput. Vis.*, pp. 10901–10911, 2021.
- Zhongwei Ren, Zhicheng Huang, Yunchao Wei, Yao Zhao, Dongmei Fu, Jiashi Feng, and Xiaoje Jin. Pixellm: Pixel reasoning with large multimodal model. In *Proceedings of the IEEE/CVF Conference on Computer Vision and Pattern Recognition*, pp. 26374–26383, 2024.
- Yi Wang, Yinan He, Yizhuo Li, Kunchang Li, Jiashuo Yu, Xin Ma, Xinhao Li, Guo Chen, Xinyuan Chen, Yaohui Wang, et al. Internvid: A large-scale video-text dataset for multimodal understanding and generation. *arXiv preprint arXiv:2307.06942*, 2023.
- Weihaoyu, Zhengyuan Yang, Linjie Li, Jianfeng Wang, Kevin Lin, Zicheng Liu, Xinchao Wang, and Lijuan Wang. Mm-vet: Evaluating large multimodal models for integrated capabilities. *arXiv preprint arXiv:2308.02490*, 2023a.

- Xianggang Yu, Mutian Xu, Yidan Zhang, Haolin Liu, Chongjie Ye, Yushuang Wu, Zizheng Yan, Chenming Zhu, Zhangyang Xiong, Tianyou Liang, et al. Mvimngnet: A large-scale dataset of multi-view images. In *IEEE Conf. Comput. Vis. Pattern Recog.*, pp. 9150–9161, 2023b.
- Yiming Zhang, ZeMing Gong, and Angel X Chang. Multi3drefer: Grounding text description to multiple 3d objects. In *Proceedings of the IEEE/CVF International Conference on Computer Vision*, pp. 15225–15236, 2023.
- Hanyu Zhou and Gim Hee Lee. Llava-4d: Embedding spatiotemporal prompt into lmms for 4d scene understanding. *arXiv preprint arXiv:2505.12253*, 2025.
- Tinghui Zhou, Richard Tucker, John Flynn, Graham Fyffe, and Noah Snavely. Stereo magnification: Learning view synthesis using multiplane images. *arXiv preprint arXiv:1805.09817*, 2018.
- Chenming Zhu, Tai Wang, Wenwei Zhang, Jiangmiao Pang, and Xihui Liu. Llava-3d: A simple yet effective pathway to empowering lmms with 3d-awareness. *arXiv preprint arXiv:2409.18125*, 2024.
